# Supplementary material for: Organic 2,5-dihydroxy-1,4-benzoquinone potassium salt with ultrahigh initial coulombic efficiency for potassium-ion batteries
Source: Royal Society of Chemistry journal article supplement (doi:10.1039/d0cc05248e), 2020-01-01
Supplement: d0cc05248e1.pdf [file d0cc05248e1.pdf]

## Support information

### **Organic 2,5-dihydroxy-1,4-benzoquinone Potassium Salt Endowing Ultrahigh Initial Coulombic Efficiency for Potassium-ion Batteries**

Qijiu Deng<sup>a\*</sup>, Congcong Tian<sup>a</sup>, Zongbin Luo<sup>a</sup>, Yangyang Zhou<sup>a</sup>, Bo Gou<sup>a</sup>, Haixuan Liu<sup>a</sup>, Yingchun Ding<sup>a,b\*</sup>, and Rong Yang<sup>c</sup>

#### **Experimental Section**

##### *1. Materials Preparation*

Organic 2,5-dihydroxy-1,4-benzoquinone potassium salt ( $K_2C_6H_2O_4$ ) was synthesized by a simple acid-base reaction. Firstly, 2,5 dihydroxy-1,4 benzoquinone was dissolved in dimethyl sulfoxide (DMSO) under a magnetic stirrer at room temperature until completely dissolution (solution A). Subsequently, stoichiometric ratio of KOH was placed in 20 ml anhydrous ethanol, and magnetic stirring 0.5 h at room temperature to dissolved completely (solution B). And then Solution B was added into solution A drop by drop and reacted at room temperature for 4 h. Afterward, the formed solution was filtered and washed with anhydrous ethanol several times. Finally, the orange  $K_2C_6H_2O_4$  powder can be obtained after drying in a vacuum oven at 110°C for 6 h. Afterward, the commercialized graphene (10 mg) was ultrasonically dispersed in N-methyl pyrrolidone (NMP) solution for 3 h. And then 90 mg of the as-prepared  $K_2C_6H_2O_4$  powder was added to the dispersed graphene dispersion. After magnetic stir and the supersonic dispersion, the above mixed solution was filtered and washed with anhydrous ethanol for several times. Finally,  $K_2C_6H_2O_4$ / graphene composite was obtained after drying in a vacuum oven for 110°C for 12 h.

##### *2. Materials characterization and electrochemical test*

X-ray diffraction (XRD, X'pert Pro MPD) pattern were used to characterize the constituent of the as-praperd samples. Fourier transform infrared spectrometer (FT-IR) was constructed to examine the information of molecular vibrations within the wavenumber ranging from 400 to 4000  $cm^{-1}$ . The morphologies and microstructures

were obtained by field-emission scanning electron microscope (FE-SEM, Hitachi, S3400N) and transmission electron microscopy (JEM-3010, Japan).  $^1\text{H}$  NMR spectra were recorded in detail on AC Bruker spectrometer (400 MHz) at room temperature ( $\text{D}_2\text{O}$  as the solvent). Electrochemical measurements were carried out by using two-electrode half cells (CR2032). The amount of the selected electrolyte was  $120\ \mu\text{L}$  for each cell. The working electrodes were prepared by casting the slurry onto a clean copper foil, where the slurry contained the prepared material (60wt%), acetylene carbon black (30wt%) and poly(vinylidene flouride) binder (PVDF, 10 wt%). And the mass loading of active material was about  $2\ \text{mg cm}^{-2}$ . The separator is glass fiber and the electrolyte is  $1\ \text{mol L}^{-1}$ (M) potassium hexafluorophosphate ( $\text{KPF}_6$ ) dissolved in dimethyl ether (DME) solvent. The galvanostatic charge-discharge curves were examined by a CT2001A/CT200C cell test instrument (LAND Electronic Co.), with the voltage range of 1-2 V (vs.  $\text{K}^+/\text{K}$ ).

### 3. Quantum calculations

Isolated molecules were relaxed without constraints using Gaussian 09 package [1] at the level of density functional theory (DFT). And they were optimized by the M06L hybrid functional [2] with the 6-31G(d) basis set. The solvent effect was with self-consistent reactions field (SCRF) based on the polarizable continuum model (PCM), where the dielectric constant ( $\epsilon$ ) was set as 33.6 from the experimental results in literature [3]. The functional of M06 [4] was applied in the single point calculations to compute molecular orbital information; and 6-311 + G\* basis set was applied on all atoms.

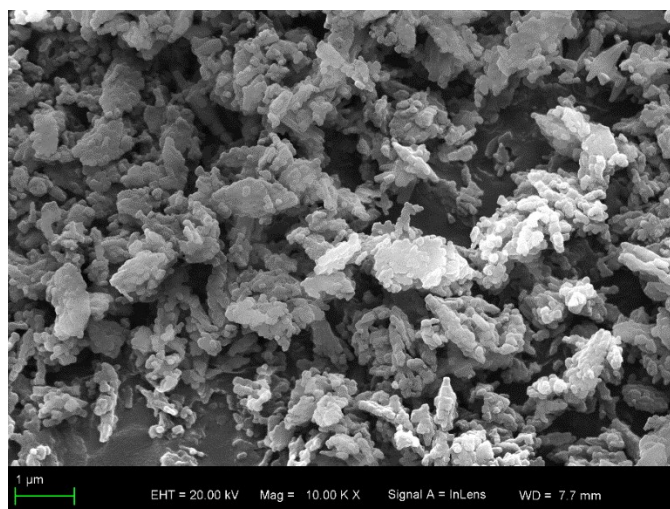

Fig. S1. The SEM image of as-prepared  $\text{K}_2\text{C}_6\text{H}_2\text{O}_4$ .

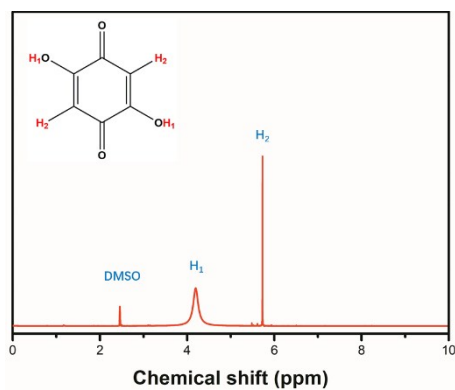

Fig.S2  $^1\text{H}$  NMR spectrum of  $\text{C}_6\text{H}_4\text{O}_4$  in the  $(\text{CD}_3)_2\text{SO}$  solvent.

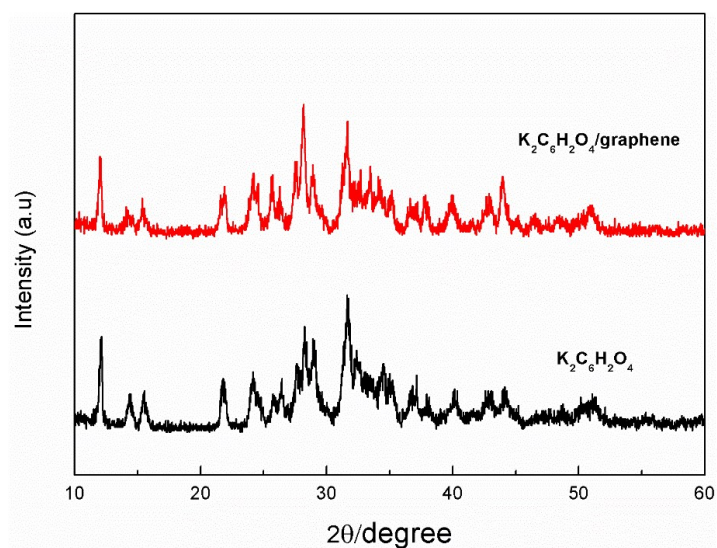

Fig. S3. The XRD patterns of as-synthesized  $\text{K}_2\text{C}_6\text{H}_2\text{O}_4$  and  $\text{K}_2\text{C}_6\text{H}_2\text{O}_4/\text{graphene}$  composite.

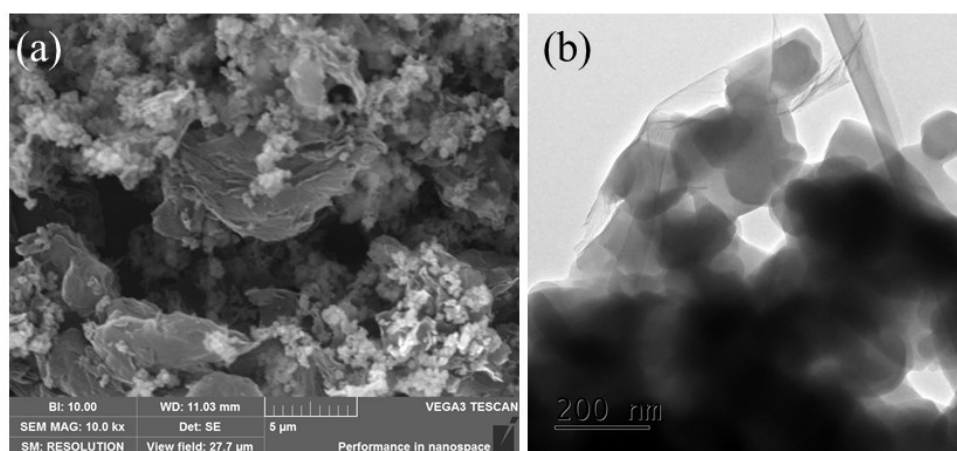

Fig. S4. (a) The SEM and (b)TEM image of as-synthesized  $\text{K}_2\text{C}_6\text{H}_2\text{O}_4$  and  $\text{K}_2\text{C}_6\text{H}_2\text{O}_4/\text{graphene}$  composite.

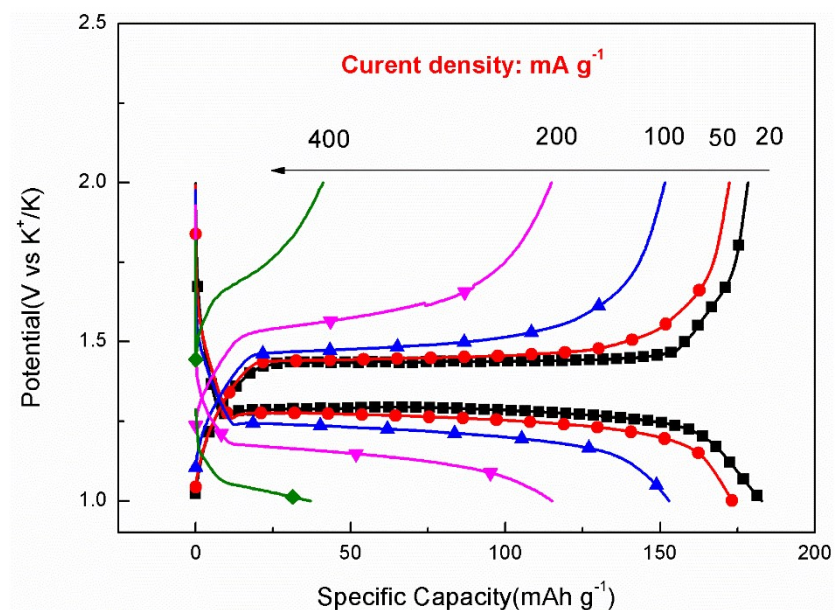

Fig. S5. The charge-discharge curves of bulk  $K_2C_6H_2O_4$  at different current density.

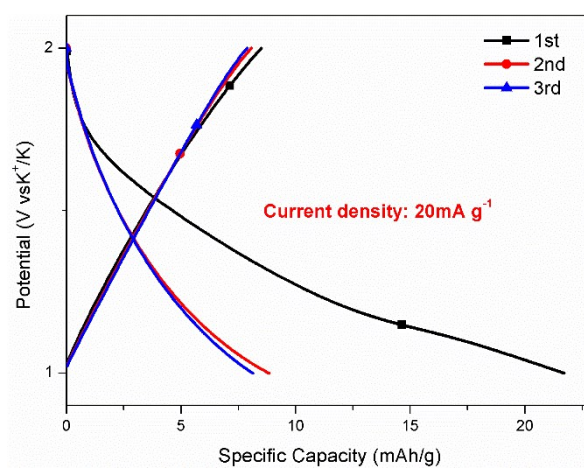

Fig.S6. The charge-discharge curves of graphene from 1 to 2 V in K-ion batteries.

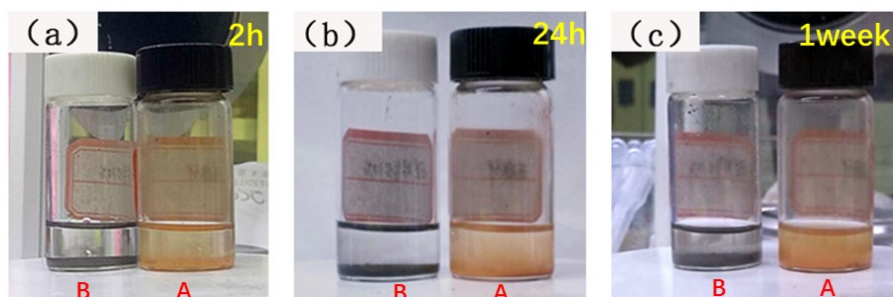

Fig.S7. The solubility test of  $K_2C_6H_2O_4$  (denotes as A) and  $K_2C_6H_2O_4$ /graphene composite (denotes as B) in selected DME electrolyte (a) after 2 h (b) after 24 h (c) after one week.

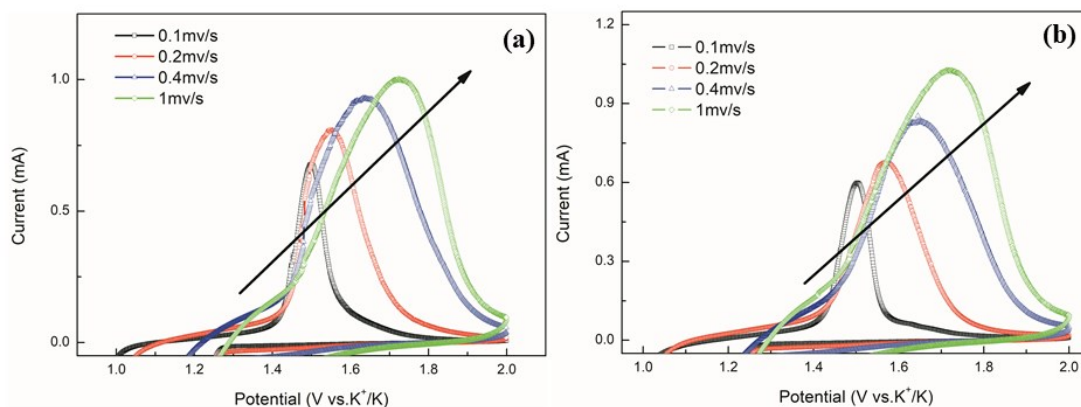

Fig.S8. The CV curves of (a)  $K_2C_6H_2O_4$  and (b)  $K_2C_6H_2O_4$ /graphene composite with different scan rates.

## References

- [1] R.D. Gaussian 09, M. J. Frisch, G. W. Trucks, H. B. Schlegel, G. E. Scuseria, M. A. Robb, J. R. Cheeseman, G. Scalmani, V. Barone, B. Mennucci, G. A. Petersson, H. Nakatsuji, M. Caricato, X. Li, H. P. Hratchian, A. F. Izmaylov, J. Bloino, G. Zheng, J. L. Sonnenberg, M. Hada, M. Ehara, K. Toyota, R. Fukuda, J. Hasegawa, M. Ishida, T. Nakajima, Y. Honda, O. Kitao, H. Nakai, T. Vreven, J. A. Montgomery, Jr., J. E. Peralta, F. Ogliaro, M. Bearpark, J. J. Heyd, E. Brothers, K. N. Kudin, V. N. Staroverov, R. Kobayashi, J. Normand, K. Raghavachari, A. Rendell, J. C. Burant, S. S. Iyengar, J. Tomasi, M. Cossi, N. Rega, J. M. Millam, M. Klene, J. E. Knox, J. B. Cross, V. Bakken, C. Adamo, J. Jaramillo, R. Gomperts, R. E. Stratmann, O. Yazyev, A. J. Austin, R. Cammi, C. Pomelli, J. W. Ochterski, R. L. Martin, K. Morokuma, V. G. Zakrzewski, G. A. Voth, P. Salvador, J. J. Dannenberg, S. Dapprich, A. D. Daniels, Ö. Farkas, J. B. Foresman, J. V. Ortiz, J. Cioslowski, and D. J. Fox, Gaussian, Inc., Wallingford CT, 2009.
- [2] Y. Zhao, D.G. Truhlar, A new local density functional for main-group thermochemistry, transition metal bonding, thermochemical kinetics, and noncovalent interactions, *J. Chem. Phys.* 125 (2006).
- [3] D.S. Hall, J. Self, J.R. Dahn, Dielectric Constants for Quantum Chemistry and Li-Ion Batteries: Solvent Blends of Ethylene Carbonate and Ethyl Methyl Carbonate, *J. Phys. Chem. C* 119 (2015) 22322–22330.
- [4] Y. Zhao, D. Truhlar, The M06 suite of density functionals for main group thermochemistry, thermochemical kinetics, noncovalent interactions, excited states, and transition elements: two new functionals and systematic testing of four M06-class functionals and 12 other functionals, *Theor. Chem. Acc.* 120 (2008) 215–241.
- [5] S. Wang, L. Wang, K. Zhang, Z. Zhu, Z. Tao, J. Chen, Organic  $Li_4C_8H_2O_6$  Nanosheets for Lithium-Ion Batteries, *Nano Lett.* 13 (2013) 4404-4409.
- [6] M. Lee, J. Hong, H. Kim, H.-D. Lim, S.B. Cho, K. Kang, C.B. Park, Organic Nanohybrids for Fast and Sustainable Energy Storage, *Adv. Mater.* 26 (2014) 2558-2565.
